# Supplementary material for: Axial Length Shortening After Orthokeratology and Its Relationship With Myopic Control
Source: Research Square preprint supplement (doi:10.21203/rs.3.rs-1193988/v1), 2022-01-20
Supplement: Supplementary file 1 [file f8015616ea011571d9d88281.xlsx]

## Sheet: 工作表1
No.	File No.	Name	Gender（1：male；2：female）	Age	K1	K2	equivalent E Value	lens brand（1：Lucid；2：Alpha）	lens diameter	Toric	Spherical equivalent at baseline	Regular astigmatism at baseline	Spherical refractive error at baseline	Axial length （AL ）of baseline	AL after 2M	Change of Al after 2M	AL after 7M	Change of Al after 7M	AL after 13M	Change of Al after 13M	AL before unwear（19M）	Change of Al after 19M	AL after 20M	reboun of AL for 19-20M	Change of AL after 20M	Mean annual change of AL	AL after reworn for 1 month(22M)	change of AL after reworn for 1 month(22M)	Spherical refractive error after 20M	Change of spherical refractive error after 20M	Regular astigmatism after 20M	Spherical equivalent after 20M	Change of spherical equivalent after 20M	Change of Regular astigmatism after 20M
Test group		1312	1313	1356	1394早期AL	1399早期AL	1438早期AL	1439早期AL
1	1290OD	/	2	9	42.5	43.75	0.52	1	10.6	0	-4.75	0	-4.75	25.2	25.11	-0.09	25.09	-0.11	25.11	-0.09	25.2	0	25.38	0.18	0.18	0.11	25.37	-0.01	-4.5	0.25	-0.75	-4.88	-0.13	-0.75
2	1317OD	/	2	9	41.5	41.75	0.65	1	10.6	0	-3.88	-1.25	-3.25	24.92	24.89	-0.03	24.91	-0.01	25.15	0.23	25.32	0.4	25.41	0.09	0.49	0.29	25.39	-0.02	-4	-0.75	-1.5	-4.75	-0.87	-0.25
3	1327OD	/	2	10	43.25	44.75	0.54	1	10.6	0	-4.75	-1	-4.25	25.18	25.1	-0.08	25.23	0.05	25.22	0.04	25.29	0.11	25.3	0.01	0.12	0.07	25.3	0	-4.5	-0.25	-0.75	-4.88	-0.13	0.25
4	1359OD	/	2	10	43	44.75	0.66	1	10.6	0	-5.13	-1.25	-4.5	24.87	24.8	-0.07	24.8	-0.07	24.89	0.02	24.95	0.08	25.08	0.13	0.21	0.13	25	-0.08	-4.5	0	-1.5	-5.25	-0.12	-0.25
5	1366OD	/	2	11	42.25	43.25	0.52	1	10.6	0	-4.75	0	-4.75	25.35	25.22	-0.13	25.28	-0.07	25.32	-0.03	25.37	0.02	25.43	0.06	0.08	0.05	25.36	-0.07	-4.75	0	0	-4.75	0	0
6	1381OD	/	2	8	42.75	44	0.61	1	10.6	0	-4.38	-1.25	-3.75	25.03	24.9	-0.13	25.05	0.02	25.1	0.07	25.21	0.18	25.35	0.14	0.32	0.19	25.35	0	-4	-0.25	-1.5	-4.75	-0.37	-0.25
7	1384OS	/	1	8	42.24	43.25	0.56	2	10.8	0	-1.5	0	-1.5	25.63	25.53	-0.1	25.47	-0.16	25.67	0.04	25.72	0.09	25.77	0.05	0.14	0.08	25.81	0.04	-1.5	0	-0.5	-1.75	-0.25	-0.5
8	1390OD	/	2	9	41.5	42.5	0.67	1	10.6	0	-3.13	-1.25	-2.5	25.13	25.1	-0.03	25.15	0.02	25.24	0.11	25.25	0.12	25.3	0.05	0.17	0.1	25.22	-0.08	-2.5	0	-1.25	-3.13	0	0
9	1402OD	/	2	11	46.25	47.5	0.62	1	10.2	0	-1.75	0	-1.75	22.06	21.95	-0.08	22.4	0.34	22.48	0.42	22.56	0.5	22.61	0.05	0.55	0.33			-2.75	-1	-0.5	-3	-1.25	-0.5
10	1405OD	/	2	14	43	43.25	0.49	1	10.6	0	-1.5	0	-1.5	23.95	23.88	-0.07	23.95	0	23.88	-0.07	23.88	-0.07	23.91	0.03	-0.04	-0.02	23.86	-0.05	-1.5	0	0	-1.5	0	0
11	1407OD	/	2	8	46	47	0.46	1	10.2	0	-2	0	-2	23.43	23.4	-0.03	23.49	0.06	23.58	0.15	23.72	0.29	23.8	0.08	0.37	0.22	23.77	-0.03	-2.5	-0.5	0	-2.5	-0.5	0
12	1429OD	/	2	11	43.25	43.25	0.65	1	10.6	0	-4.13	-0.75	-3.75	25.15	25.12	-0.03	25.18	0.03	23.23	-1.92	25.3	0.15	25.47	0.17	0.32	0.19	25.41	-0.06	-4	-0.25	-0.5	-4.25	-0.12	0.25
13	1433OD	/	1	9	43.5	45	0.69	1	11	0	-2.5	-1.5	-1.75	24.5	24.47	-0.03	24.48	-0.02	25.54	1.04	24.6	0.1	24.76	0.16	0.26	0.16	24.66	-0.1	-2.75	-1	-1.25	-3.38	-0.88	0.25
14	1440OS	/	1	10	44.25	45.75	0.53	1	11	0	-4	-1.5	-3.25	25.63	25.58	-0.05	25.53	-0.1	25.6	-0.03	25.66	0.03	25.78	0.12	0.15	0.09	25.68	-0.1	-4	-0.75	-1.5	-4.75	-0.75	0
15	1444OD	/	2	11	43.5	45.25	0.73	1	10.6	0	-4	-1	-3.5	25.37	25.34	-0.03	25.38	0.01	25.43	0.06	25.55	0.18	25.71	0.16	0.34	0.2	25.7	-0.01	-4	-0.5	-1.25	-4.63	-0.63	-0.25
16	1465OD	/	1	12	42.75	44.5	0.57	1	10.2	0	-5.38	-0.75	-5	25.57	25.44	-0.13	25.56	-0.01	25.5	-0.07	25.52	-0.05	25.58	0.06	0.01	0.01	25.54	-0.04	-5	0	-0.5	-5.5	-0.12	0.25
17	1512OD	/	1	9	41	42.25	0.81	1	10.6	0	-1.63	-0.75	-1.25	24.65	24.5	-0.15	24.83	0.18	25.08	0.43	25.18	0.53	25.2	0.02	0.55	0.33			-1.5	-0.25	-1	-2	-0.37	-0.25
18	1488OD	/	2	11	44	45.75	0.61	2	10.8	0	-2.75	-0.5	-2.5	24.25	24.22	-0.03	24.2	-0.05	24.21	-0.04	24.31	0.06	24.41	0.1	0.16	0.1	24.33	-0.08	-2.75	-0.25	-0.5	-3	-0.25	0
19	1556OD	/	1	8	42.25	42.5	0.76	2	10.4	0	-1.25	0	-1.25	24.25	24.14	-0.11	24.4	0.15	24.5	0.25	24.56	0.31	24.62	0.06	0.37	0.22	24.72	0.1	-1.25	0	-0.75	-1.63	-0.38	-0.75
20	1579OD	/	1	13	40.25	41.25	0.58	1	10.6	0	-3.13	-0.75	-2.75	26.71	26.67	-0.04	26.67	-0.04	26.68	-0.03	26.65	-0.06	26.71	0.06	0	0	26.67	-0.04	-2.75	0	0	-2.75	0.38	0.75
21	1595OD	/	2	10	44	45	0.55	1	10.6	0	-2.88	-0.75	-2.5	23.8	23.69	-0.11	23.8	0	23.85	0.05	23.9	0.1	24	0.1	0.2	0.12	24	0	-2.75	-0.25	-0.75	-3.13	-0.25	0
22	1642OD	/	2	9	42.25	43.5	0.61	1	10.6	0	-2.25	-1	-1.75	24.6	24.56	-0.04	24.77	0.17	25.1	0.5	25.25	0.65	25.35	0.1	0.75	0.45	25.29	-0.06	-3.5	-1.75	-1.25	-4.13	-1.88	-0.25
23	1654OD	/	2	11	40	41.25	0.65	1	10.6	0	-3.25	-1.5	-2.5	25.62	25.47	-0.15	25.66	0.04	25.72	0.1	25.89	0.27	25.93	0.04	0.31	0.19	26	0.07	-3	-0.5	-1.5	-3.75	-0.5	0
24	1655OS	/	1	9	45.25	45.5	0.51	1	10.8	0	-3.25	0	-3.25	24.49	24.38	-0.11	24.4	-0.09	24.42	-0.07	24.51	0.02	24.61	0.1	0.12	0.07			-3.75	-0.5	0	-3.75	-0.5	0
25	1657OD	/	2	9	44.25	45.25	0.62	1	10.2	0	-1.5	0	-1.5	23.35	23.21	-0.14	23.22	-0.13	23.28	-0.07	23.36	0.01	23.43	0.07	0.08	0.05	23.42	-0.01	-1.5	0	0	-1.5	0	0
26	1667OD	/	1	9	41.75	42.25	0.6	1	10.6	0	-2.25	0	-2.25	25.1	24.92	-0.18	25	-0.1	25.11	0.01	25.14	0.04	25.21	0.07	0.11	0.07	25.17	-0.04	-2.5	-0.25	-0.75	-2.88	-0.63	-0.75
27	1677OD	/	1	10	41.5	42.75	0.57	1	10.6	0	-1	-0.5	-0.75	24.25	24.19	-0.06	24.17	-0.08	24.2	-0.05	24.24	-0.01	24.35	0.11	0.1	0.06	24.3	-0.05	-0.75	0	-0.75	-1.13	-0.13	-0.25
28	1679OD	/	2	10	43.5	44.75	0.59	1	10.6	0	-1.25	0	-1.25	23.53	23.48	-0.05	23.68	0.15	23.77	0.24	23.9	0.37	24.02	0.12	0.49	0.29	23.96	-0.06	-2.25	-1	0	-2.25	-1	0
29	1683OD	/	2	9	43	44.5	0.66	1	10.6	0	-0.75	0	-0.75	23.76	23.67	-0.09	23.83	0.07	23.97	0.21	24.07	0.31	24.16	0.09	0.4	0.24	24.1	-0.06	-1	-0.25	-0.75	-1.38	-0.63	-0.75
30	1695OD	/	2	8	41	41.5	0.85	1	10.6	0	-1.75	0	-1.75	24.94	24.83	-0.09	25.13	0.19	25.32	0.38	25.43	0.49	25.53	0.1	0.59	0.35	25.55	0.02	-2.75	-1	-0.5	-3	-1.25	-0.5
31	1703OD	/	2	10	42.25	42.75	0.62	1	10.6	0	-1.25	0	-1.25	24.22	24.07	-0.15	24.16	-0.06	24.24	0.02	24.34	0.12	24.46	0.12	0.24	0.14	24.38	-0.08	-1.75	-0.5	0	-1.75	-0.5	0
32	1707OD	/	2	10	43.75	44.75	0.5	1	10.6	0	-4	-0.5	-3.75	24.88	24.85	-0.03	24.88	0	24.88	0	25.02	0.14	25.12	0.1	0.24	0.14	25.05	-0.07	-4	-0.25	0	-4	0	0.5
33	1724OS	/	1	10	42	44.25	0.62	1	10.6	0	-4.5	-1.5	-3.75	25.66	25.61	-0.05	25.73	0.07	25.81	0.15	25.81	0.15	25.89	0.08	0.23	0.14	25.83	-0.06	-4	-0.25	-2	-5.5	-1	-0.5
34	1735OD	/	1	9	41	42.25	0.77	2	10.6	0	-2.5	0	-2.5	25.64	25.55	-0.09	23.7	-1.94	25.88	0.24	26.02	0.38	26.11	0.09	0.47	0.28	26.07	-0.04	-3	-0.5	-0.75	-3.38	-0.88	-0.75
35	1749OD	/	2	8	42.75	45	0.62	2	10.6	0	-3.25	-1.5	-2.5	24.43	24.4	-0.03	24.32	-0.11	24.38	-0.05	24.4	-0.03	24.48	0.08	0.05	0.03	24.48	0	-2	0.5	-1.25	-2.63	0.62	0.25
36	1781OS	/	2	11	43	44.5	0.5	1	10.6	0	-4.13	-0.75	-3.75	25.4	25.3	-0.1	25.27	-0.13	25.33	-0.07	25.33	-0.07	25.41	0.08	0.01	0.01	25.28	-0.13	-3.5	0.25	-1.25	-4.13	0	-0.5
37	1789OD	/	2	8	41	41.5	0.77	1	10.4	0	-1.5	0	-1.5	24.98	24.95	-0.03	24.98	0	24.99	0.01	25.07	0.09	25.2	0.13	0.22	0.13	25.2	0	-1.75	-0.25	0	-1.75	-0.25	0
38	1811OD	/	2	9	41.25	42.5	0.54	1	10.6	0	-2.5	0	-2.5	25.59	25.49	-0.1	25.47	-0.12	25.52	-0.07	25.71	0.12	25.79	0.08	0.2	0.12	25.81	0.02	-2.5	0	0	-2.5	0	0
39	1818OD	/	1	11	42.5	43.5	0.59	2	11	0	-1.25	0	-1.25	24.06	23.99	-0.07	24.02	-0.04	24.15	0.09	24.22	0.16	24.35	0.13	0.29	0.17	24.35	0	-1.5	-0.25	-0.5	-1.75	-0.5	-0.5
40	1827OD	/	1	9	42.5	44	0.6	1	11	-1	-3.75	-1.5	-3	25.35	25.23	-0.12	25.15	-0.2	25.44	0.09	25.46	0.11	25.56	0.1	0.21	0.13	25.49	-0.07	-3.25	-0.25	-1.5	-4	-0.25	0
41	1835OD	/	1	11	43.5	44.75	0.55	1	10.6	0	-4	0	-4	25.77	25.71	-0.06	25.7	-0.07	25.76	-0.01	25.8	0.03	26.04	0.24	0.27	0.16	25.95	-0.09	-4	0	-0.5	-4.25	-0.25	-0.5
42	1856OD	/	1	9	45.25	46.25	0.6	1	10.2	0	-3.25	0	-3.25	23.78	23.66	-0.12	23.93	0.15	24.06	0.28	24.1	0.32	24.28	0.18	0.5	0.3	24.23	-0.05	-3.25	0	-1	-3.75	-0.5	-1
43	1867OS	/	2	9	44	46	0.6	1	10.6	-2	-3.25	-1.5	-2.5	24.29	24.24	-0.05	24.3	0.01	24.49	0.2	24.6	0.31	24.76	0.16	0.47	0.28	24.72	-0.04	-3.5	-1	-1.5	-4.25	-1	0
44	1874OS	/	1	11	42	43.25	0.76	1	10.6	0	-3.25	-1	-2.75	24.93	24.89	-0.04	25.03	0.1	25.11	0.18	25.2	0.27	25.27	0.07	0.34	0.2			-3	-0.25	-1.25	-3.63	-0.38	-0.25
45	1891OD	/	1	9	45.5	46.75	0.49	1	10.6	0	-1.36	-0.75	-1	22.93	22.87	-0.05	23.1	0.17	23.25	0.32	23.29	0.36	23.38	0.09	0.45	0.27	23.32	-0.06	-1.5	-0.5	-1	-2	-0.64	-0.25
46	1912OD	/	2	8	44	44.5	0.58	2	10.6	0	-2.75	0	-2.75	23.87	23.78	-0.09	23.78	-0.09	23.93	0.06	24.01	0.14	24.18	0.17	0.31	0.19	24.2	0.02	-2.75	0	-0.5	-3	-0.25	-0.5
47	1919OD	/	1	8	42.75	44.25	0.73	1	10.8	0	-4.38	-1.25	-3.75	25.12	25.09	-0.03	25.16	0.04	25.3	0.18	25.48	0.36	25.66	0.18	0.54	0.32			-4	-0.25	-1.25	-4.63	-0.25	0
48	1931OS	/	2	8	43.25	43.75	0.61	1	10.2	0	-4.25	-0.5	-4	24.64	24.58	-0.06	24.71	0.07	24.76	0.12	24.85	0.21	25.02	0.17	0.38	0.23	24.95	-0.07	-3.75	0.25	-1.25	-4.38	-0.13	-0.75
48	1937OD	/	2	9	42.25	42.75	0.66	2	10.6	0	-4.25	0	-4.25	25.6	25.5	-0.1	25.49	-0.11	25.48	-0.12	25.54	-0.06	25.65	0.11	0.05	0.03	25.56	-0.09	-4.25	0	-0.25	-4.38	-0.13	-0.25
50	1967OD	/	2	8	44.5	46.25	0.67	1	10.6	0	-3.25	-1.5	-2.5	23.53	23.42	-0.11	23.6	0.07	23.7	0.17	24.01	0.48	24.2	0.19	0.67	0.4			-3	-0.5	-1.75	-3.88	-0.63	-0.25
51	1979OD	/	1	11	44.5	46.25	0.55	1	10.6	0	-4.25	-1	-3.75	24.63	24.56	-0.07	24.66	0.03	24.78	0.15	24.96	0.33	25.05	0.09	0.42	0.25			-4.25	-0.5	-1.75	-5.13	-0.88	-0.75
52	1985OD	/	2	10	45.75	47	0.78	1	10.6	0	-1.25	0	-1.25	22.63	22.56	-0.07	22.55	-0.08	22.56	-0.07	22.59	-0.04	22.59	0	-0.04	-0.02	22.56	-0.03	-1	0.25	-1.25	-1.63	-0.38	-1.25
53	1999OD	/	1	9	41.75	43.25	0.82	1	10.8	0	-2.88	-0.75	-2.5	24.76	24.72	-0.04	24.84	0.08	25	0.24	25.09	0.33	25.25	0.16	0.49	0.29	25.21	-0.04	-2.75	-0.25	-1	-3.25	-0.37	-0.25
54	2015OS	/	1	10	41	42.5	0.75	1	10.6	0	-3.5	-1	-3	26	25.96	-0.04	25.99	-0.01	26.01	0.01	26.05	0.05	26.23	0.18	0.23	0.14			-4	-1	-1.25	-4.63	-1.13	-0.25
Control group
1	1371	/	2	9	41.75	42.25	0.61	1	10.6	0	-2.5	0	-2.5	25.6	25.67	0.07	25.98	0.38	26.28	0.68	26.28	0.68	26.35	0.07	0.75	0.45			-3.5	-1	-0.5	-3.75	-1.25	-0.5
2	1382	/	2	8	44	44.75	0.61	1	10.6	0	-2.25	0	-2.25	23.91	23.96	0.05	24.03	0.12	24.16	0.25	24.33	0.42	24.34	0.01	0.43	0.26	24.37	0.03	-3	-0.75	0	-3	-0.75	0
3	1397	/	1	12	40	41	0.77	1	10.6	0	-3.13	-1.25	-2.5	25.83	25.9	0.07	25.98	0.15	26.17	0.34	26.25	0.42	26.32	0.07	0.49	0.29	26.32	0	-3.25	-0.75	-1.5	-4	-0.87	-0.25
4	1398	/	1	8	43	44	0.62	1	10.6	0	-3.25	0	-3.25	25.64	25.67	0.03	25.9	0.26	26.09	0.45	26.26	0.62	26.35	0.09	0.71	0.43	26.36	0.01	-4.25	-1	-0.5	-4.5	-1.25	-0.5
5	1436	/	1	11	44.25	46	0.61	2	10.6	0	-3.13	-1.25	-2.5	24.64	24.69	0.05	24.72	0.08	24.78	0.14	24.91	0.27	25.02	0.11	0.38	0.23	24.97	-0.05	-3	-0.5	-1.25	-3.63	-0.5	0
6	1462	/	2	8	41.25	42.25	0.65	1	10.6	0	-2	0	-2	24.5	24.52	0.02	24.76	0.26	24.95	0.45	25.14	0.64	25.18	0.04	0.68	0.41			-3	-1	-0.5	-3.25	-1.25	-0.5
7	1469	/	2	9	42.75	43.5	0.63	1	10.8	0	-3.25	0	-3.25	24.67	24.73	0.06	25.01	0.34	25.27	0.6	25.43	0.76	25.48	0.05	0.81	0.49	25.54	0.06	-4.75	-1.5	-0.5	-5	-1.75	-0.5
8	1471	/	2	8	41.5	42.25	0.69	1	10.6	0	-2	0	-2	24.51	24.63	0.12	24.71	0.2	24.87	0.36	25.03	0.52	25.13	0.1	0.62	0.37			-2.75	-0.75	-0.75	-3.13	-1.13	-0.75
9	1486	/	1	8	42.75	43.75	0.65	1	10.6	0	-1.25	0	-1.25	23.78	23.82	0.05	23.86	0.08	24.1	0.32	24.3	0.52	24.35	0.05	0.57	0.34	24.35	0	-2	-0.75	0	-2	-0.75	0
10	1499	/	1	10	44	45.25	0.59	1	10.6	0	-2	-0.5	-1.75	23.65	23.68	0.03	23.83	0.18	23.86	0.21	24.05	0.4	24.08	0.03	0.43	0.26	24.12	0.04	-2.5	-0.75	-0.5	-2.75	-0.75	0
11	1509	/	2	8	44.5	45.25	0.53	2	10.6	0	-2.75	-0.5	-2.5	23.65	23.72	0.07	23.81	0.16	23.93	0.28	24.23	0.58	24.27	0.04	0.62	0.37			-3.25	-0.75	-1	-3.75	-1	-0.5
12	1515	/	2	10	43.75	44.5	0.53	1	10.6	0	-2.5	0	-2.5	24.01	24.12	0.11	24.28	0.27	24.52	0.51	24.74	0.73	24.72	-0.02	0.71	0.43	24.7	-0.02	-3	-0.5	-0.75	-3.38	-0.88	-0.75
13	1526	/	2	8	42.75	43.75	0.54	1	10.2	0	-1	0	-1	23.38	23.41	0.03	23.56	0.18	23.6	0.22	23.76	0.38	23.78	0.02	0.4	0.24	23.82	0.04	-1.5	-0.5	0	-1.5	-0.5	0
14	1530	/	2	8	42.5	43.25	0.52	1	10.2	0	-1.5	0	-1.5	23.74	23.76	0.02	23.88	0.14	23.93	0.19	24.03	0.29	24.05	0.02	0.31	0.19	24.06	0.01	-2	-0.5	0	-2	-0.5	0
15	1538	/	2	8	42.25	42.5	0.64	1	10.6	0	-2.13	-0.75	-1.75	24.02	24.18	0.16	24.53	0.51	24.72	0.7	24.9	0.88	24.93	0.03	0.91	0.55	24.88	-0.05	-3.75	-2	0	-3.75	-1.62	0.75
16	1578	/	2	8	42.5	43.75	0.63	1	10.6	0	-3.38	-0.75	-3	24.92	24.99	0.07	25.1	0.18	25.13	0.21	25.35	0.43	25.41	0.06	0.49	0.29			-3.25	-0.25	-1	-3.75	-0.37	-0.25
17	1583	/	2	9	42.5	43.5	0.67	1	10.6	0	-2.25	-0.5	-2	24.43	24.46	0.03	24.57	0.14	24.67	0.24	24.82	0.39	24.9	0.08	0.47	0.28			-3.5	-1.5	-0.5	-3.75	-1.5	0
18	1592	/	1	8	42.75	43.5	0.65	1	10.6	0	-4	0	-4	25.55	25.6	0.05	25.73	0.18	25.81	0.26	25.92	0.37	26.02	0.1	0.47	0.28			-4.5	-0.5	0	-4.5	-0.5	0
19	1606	/	2	8	42	43.5	0.59	1	10.6	0	-3.25	-1	-2.75	24.57	24.68	0.11	24.72	0.15	25.14	0.57	25.33	0.76	25.47	0.14	0.9	0.54	25.55	0.08	-4	-1.25	-1.25	-4.63	-1.38	-0.25
20	1607	/	2	8	44.5	46.5	0.63	1	10.6	0	-2.75	-1.5	-2	23.48	23.53	0.05	23.48	0	23.5	0.02	23.57	0.09	23.63	0.06	0.15	0.09	23.61	-0.02	-2	0	-1.75	-2.88	-0.13	-0.25
21	1611	/	2	8	44	45.5	0.48	1	11	0	-1.75	0	-1.75	24.35	24.4	0.05	24.58	0.23	24.77	0.42	24.87	0.52	24.89	0.02	0.54	0.32			-2.5	-0.75	-0.5	-2.75	-1	-0.5
22	1619	/	1	9	42.5	43.25	0.71	2	10.4	0	-4.75	-0.5	-4.5	25.54	25.57	0.03	25.66	0.12	25.82	0.28	26.02	0.48	26.14	0.12	0.6	0.36			-5.25	-0.75	-0.5	-5.5	-0.75	0
23	1632	/	2	8	42.25	42.75	0.6	1	10.6	0	-1.5	0	-1.5	24.6	24.7	0.1	24.77	0.17	24.85	0.25	24.99	0.39	25.07	0.08	0.47	0.28			-2.5	-1	0	-2.5	-1	0
24	1645	/	2	9	42.25	44	0.55	1	10.6	0	-2.75	-1	-2.25	24.67	24.74	0.07	24.9	0.23	25.26	0.59	25.36	0.69	25.42	0.06	0.75	0.45			-3.5	-1.25	-1.25	-4.13	-1.38	-0.25
25	1653	/	2	9	43	43.75	0.59	1	10.2	0	-3.25	0	-3.25	24.92	24.99	0.07	25.22	0.3	25.35	0.43	25.54	0.62	25.62	0.08	0.7	0.42	25.67	0.05	-4.25	-1	-0.5	-4.5	-1.25	-0.5
26	1657	/	1	9	44.5	44.75	0.43	1	10.8	0	-3	0	-3	24.56	24.6	0.04	24.59	0.03	24.64	0.08	24.81	0.25	24.86	0.05	0.3	0.18	24.92	0.06	-4	-1	0	-4	-1	0
27	1662	/	2	8	42.25	42.5	0.57	1	10.6	0	-1.75	0	-1.75	24.71	24.82	0.11	24.88	0.17	24.94	0.23	25.02	0.31	25.1	0.08	0.39	0.23			-2.5	-0.75	0	-2.5	-0.75	0
28	1666	/	2	8	42.25	43.25	0.72	1	10.6	0	-2.63	-0.75	-2.25	24.09	24.17	0.08	24.39	0.3	24.59	0.5	24.77	0.68	24.82	0.05	0.73	0.44			-3.5	-1.25	-1.25	-4.13	-1.5	-0.5
29	1682	/	1	10	44.5	45.5	0.65	1	10.2	0	-1.5	-0.5	-1.25	23.48	23.49	0.01	23.63	0.15	23.8	0.32	23.88	0.4	23.91	0.03	0.43	0.26	23.95	0.04	-1.5	-0.25	-0.5	-1.75	-0.25	0
30	1694	/	1	9	41.75	43	0.66	1	10.8	-1	-2.25	-0.5	-2	24.15	24.16	0.01	24.28	0.13	24.31	0.16	24.38	0.23	24.41	0.03	0.26	0.16			-2	0	-0.5	-2.25	0	0
31	1710OD	/	2	9	43.25	44	0.63	2	10.4	0	-3	0	-3	24.51	24.54	0.03	24.73	0.22	24.92	0.41	24.99	0.48	25.07	0.08	0.56	0.34			-3.75	-0.75	-0.5	-4	-1	-0.5
32	1719OD	/	2	9	42.75	44	0.69	2	10.2	0	-2.25	-0.5	-2	23.79	23.84	0.05	24.08	0.29	24.27	0.48	24.37	0.58	24.42	0.05	0.63	0.38			-2.75	-0.75	-0.75	-3.13	-0.88	-0.25
33	1730OD	/	1	10	42.5	44.25	0.62	1	10.6	0	-4.88	-1.25	-4.25	25.73	25.74	0.01	25.78	0.05	25.81	0.08	25.94	0.21	26.08	0.14	0.35	0.21	26.08	0	-5	-0.75	-1.5	-5.75	-0.87	-0.25
34	1734OD	/	2	10	43.5	44.75	0.63	2	10.6	0	-3.75	0	-3.75	24.01	24.07	0.06	24.12	0.11	24.21	0.2	24.3	0.29	24.34	0.04	0.33	0.2	24.36	0.02	-4.5	-0.75	0	-4.5	-0.75	0
35	1737OD	/	2	10	42.25	43.25	0.73	1	10.2	0	-2.63	-0.75	-2.25	24.87	24.94	0.07	25	0.13	25.07	0.2	25.11	0.24	25.12	0.01	0.25	0.15	25.14	0.02	-2.5	-0.25	-1	-3	-0.37	-0.25
36	1743OD	/	2	10	42.5	42.75	0.7	1	10.6	0	-4	0	-4	24.95	24.99	0.04	25.07	0.12	25.25	0.3	25.39	0.44	25.42	0.03	0.47	0.28			-4.75	-0.75	0	-4.75	-0.75	0
37	1745OS	/	1	9	42.25	43.5	0.72	1	10.6	0	-1.5	-0.5	-1.25	23.93	23.94	0.01	24	0.07	24.05	0.12	24.36	0.43	24.4	0.04	0.47	0.28	24.51	0.11	-2	-0.75	-0.5	-2.25	-0.75	0
38	1748OD	/	1	10	41.25	42	0.72	2	10.4	0	-0.75	0	-0.75	24.77	24.86	0.09	24.91	0.14	25.13	0.36	25.27	0.5	25.3	0.03	0.53	0.32	25.31	0.01	-1.75	-1	-0.5	-2	-1.25	-0.5
39	1748OS	/	1	10	41.5	42	0.71	2	10.4	0	-0.75	0	-0.75	24.77	24.79	0.02	24.71	-0.06	25.09	0.32	25.26	0.49	25.29	0.03	0.52	0.31	25.29	0	-2	-1.25	-0.5	-2.25	-1.5	-0.5
40	1847OD	/	2	12	43	44.25	0.64	1	10.6	0	-4.25	-0.5	-4	26.03	26.04	0.01	26.2	0.17	26.21	0.18	26.24	0.21	26.33	0.09	0.3	0.18	26.33	0	-4.25	-0.25	-0.5	-4.5	-0.25	0
41	1855OD	/	2	16	43.5	44.5	0.56	1	10.6	0	-2.75	0	-2.75	23.54	23.57	0.03	23.81	0.27	23.97	0.43	24.07	0.53	24.12	0.05	0.58	0.35	24.26	0.14	-3.5	-0.75	-0.5	-3.75	-1	-0.5
42	1856OS	/	1	9	45	46	0.64	1	10.2	0	-2.5	-0.5	-2.25	23.77	23.82	0.05	23.98	0.21	24.04	0.27	24.12	0.35	24.16	0.04	0.39	0.23			-3	-0.75	-0.75	-3.38	-0.88	-0.25
43	1862OD	/	2	8	44.5	45.75	0.6	2	10.6	0	-2.25	0	-2.25	24.05	24.17	0.12	24.28	0.23	24.38	0.33	24.58	0.53	24.59	0.01	0.54	0.32	24.63	0.04	-3	-0.75	-1.5	-3.75	-1.5	-1.5
44	1878OD	/	1	9	42.75	43.75	0.5	1	10.6	0	-3.25	-1	-2.75	24.6	24.67	0.07	24.7	0.1	24.79	0.19	24.92	0.32	25.05	0.13	0.45	0.27			-3.75	-1	-0.75	-4.13	-0.88	0.25
45	1905OD	/	1	9	42.5	43.5	0.73	1	10.6	0	-2.25	-0.5	-2	24.33	24.36	0.03	24.47	0.14	24.51	0.18	24.57	0.24	24.84	0.27	0.51	0.31	24.84	0	-3	-1	-0.5	-3.25	-1	0
46	1907OD	/	1	9	42.5	44	0.72	1	10.2	0	-4.25	-1	-3.75	24.37	24.41	0.04	24.56	0.19	24.71	0.34	24.95	0.58	25.1	0.15	0.73	0.44	25.18	0.08	-5	-1.25	-0.75	-5.38	-1.13	0.25
47	1920OD	/	2	10	43.5	45	0.67	1	10.6	0	-3.75	-0.5	-3.5	24.64	24.68	0.04	24.77	0.13	24.88	0.24	25.06	0.42	25.12	0.06	0.48	0.29			-3.75	-0.25	-1.5	-4.5	-0.75	-1
48	1959OD	/	2	9	42.75	44	0.5	2	10.8	0	-1.75	0	-1.75	24.6	24.71	0.11	24.89	0.29	25.03	0.43	25.1	0.5	25.13	0.03	0.53	0.32			-2.75	-1	-0.75	-3.13	-1.38	-0.75
48	1965OD	/	2	8	41.5	42.5	0.6	2	10.6	0	-4.25	-0.5	-4	25.94	25.97	0.03	26.07	0.13	26.11	0.17	26.16	0.22	26.28	0.12	0.34	0.2			-4.5	-0.5	-0.5	-4.75	-0.5	0
50	1973OD	/	1	9	43.5	44.75	0.57	1	10.6	0	-1.38	-0.75	-1	24.35	24.42	0.07	24.54	0.19	24.61	0.26	24.74	0.39	24.82	0.08	0.47	0.28	24.44	-0.38	-2.25	-1.25	-0.5	-2.5	-1.12	0.25
51	1990OD	/	2	8	42	43.5	0.57	1	11	-1	-2.5	-0.5	-2.25	24.99	25.03	0.04	25.12	0.13	25.24	0.25	25.36	0.37	25.39	0.03	0.4	0.24			-2.5	-0.25	-0.75	-2.88	-0.38	-0.25
52	2014OD	/	2	10	42.5	42.75	0.67	1	10.6	0	-1	0	-1	23.89	23.9	0.01	24.01	0.12	24.11	0.22	24.31	0.42	24.4	0.09	0.51	0.31	24.4	0	-2	-1	0	-2	-1	0
